# Supplementary material
Source: publisher site journal article supplement (https://www.dovepress.com/get_supplementary_file.php?f=276690.docx)
Supplement: Supplementary file 1 [file get_supplementary_file.php]

Table S1:

Adjustment errors in the integer and fractional-order models in the studied groups. The smallest error in comparisons of the evaluated models is indicated in bold.

|  | eRIC | FrOr |
| --- | --- | --- |
| Control |  |  |
| MSE (cmH2O/L/s) | 0.091± 0.081 | **0.076 ± 0.075** |
| Rd (%) | 5.100 ± 2.255 | **4.560 ± 1.923** |
| Mild COPD |  |  |
| MSE (cmH2O/L/s) | 0.212 ± 0.320 | **0.124 ± 0.132** |
| Rd (%) | 4.581 ± 2.792 | **3.794 ± 1.789** |
| Moderate COPD |  |  |
| MSE (cmH2O/L/s) | 0.155 ± 0.226 | **0.111 ± 0.087** |
| Rd (%) | 3.950 ± 1.980 | **3.320 ± 1.278** |
| Severe COPD |  |  |
| MSE (cmH2O/L/s) | 0.269 ± 0.339 | **0.181 ± 0.245** |
| Rd (%) | 4.300 ± 2.379 | **3.307 ± 1.448** |
| Very severe COPD |  |  |
| MSE (cmH2O/L/s) | 0.703 ± 0.663 | **0.306 ± 0.351** |
| Rd (%) | 4.509 ± 2.796 | **2.252 ± 0.655** |

eRIC – extended resistance-inertance-compliance model; FrOr – Fracional-order model; MSE – mean square error; Rd – Relative distance.

Table S2:

Correlation analysis between the eRIC model parameters and the smoking load in patients with COPD.

|  | R | | Rp | | Rt | | | | I | | | |  | | C | |
| --- | --- | --- | --- | --- | --- | --- | --- | --- | --- | --- | --- | --- | --- | --- | --- | --- |
|  | r | p | r | p | r | | p | | r | | p | | r | | p | |
| Pack-years | -0.12 | ns | 0.03 | ns | | -0.04 | | ns | | 0.09 | | ns | | 0.002 | | ns |

R, central resistance; Rp, peripheral resistance; Rt, total resistance; I, respiratory system inertance; C, respiratory compliance; ns = non-significant.

Table S3:

Correlation analysis between the FrOr model parameters and the smoking load in patients with COPD.

|  | G | | H | | η | |
| --- | --- | --- | --- | --- | --- | --- |
|  | r | p | r | p | r | p |
| Pack-years | -0.09 | ns | -0.05 | ns | -0.05 | ns |

G, respiratory damping; H, respiratory elastance; η, respiratory hysteresivity; ns = non-significant.

Table S4:

Area under the receiver-operator characteristics values and the confidence interval associated with traditional FOT parameters.

|  |  | **COPD I** | **COPD II** | **COPD III** | **COPD IV** |
| --- | --- | --- | --- | --- | --- |
| R0 | AUC  Se  IC | 0.762  0.0689  0.638 - 0.860 | 0.686  0.0903  0.557 - 0.797 | **0.904**  0.0609  0.803 - 0.964 | **0.969**  0.0203  0.891 - 0.996 |
| Rm | AUC  Se  IC | 0.759  0.0678  0.635 - 0.858 | 0.636  0.0903  0.505 - 0.753 | **0.847**  0.0647  0.734 - 0.925 | **0.940**  0.0379  0.849 - 0.984 |
| S | AUC  Se  IC | 0.623  0.0915  0.492 - 0.742 | 0.740  0.0850  0.614 - 0.842 | **0.854**  0.0726  0.743 - 0.931 | **0.805**  0.0900  0.686 - 0.894 |
| R4 | AUC  Se  IC | 0.731  0.0728  0.604 - 0.835 | .651  0.0874  0.520 - 0.766 | **0.867**  0.0623  0.757 - 0.939 | **0.889**  0.0542  0.784 - 0.954 |
| R12 | AUC  Se  IC | **0.809**  0.0590  0.690 - 0.897 | 0.672  0.0878  0.542 - 0.785 | **0.856**  0.0625  0.744 - 0.931 | **0.947**  0.0362  0.859 - 0.988 |
| R20 | AUC  Se  IC | 0.663  0.0819  0.533 - 0.777 | 0.544  0.0898  0.414 - 0.671 | 0.670  0.0811  0.540 - 0.784 | **0.833**  0.0563  0.718 - 0.915 |
| R4-R20 | AUC  Se  IC | 0.731  0.0788  0.604 - 0.835 | 0.759  0.0774  0.635 - 0.858 | **0.867**  0.0721  0.757 - 0.939 | **0.841**  0.0813  0.727 - 0.921 |
| Xm | AUC  Se  IC | 0.569  0.0789  0.438 - 0.693 | 0.799  0.0606  0.679 - 0.889 | **0.946**  0.0302  0.858 - 0.987 | **1.000**  0.000  0.943 - 1.000 |
| Cdyn | AUC  Se  IC | **0.805**  0.0593  0.686 - 0.894 | 0.698  0.0920  0.569 - 0.807 | **0.893**  0.0635  0.789 - 0.957 | **1.000**  0.000  0.943 - 1.000 |
| fr | AUC  Se  IC | 0.598  0.0755  0.466 - 0.719 | **0.809**  0.0559  0.690 - 0.897 | **0.943**  0.0307  0.854 - 0.986 | **0.991**  0.00734  0.927 - 1.000 |
| Axt | AUC  Se  IC | 0.753  0.0696  0.628 - 0.853 | **0.804**  0.0604  0.684 - 0.893 | **0.957**  0.0278  0.873 - 0.992 | **1.000**  0.000  0.943 - 1.000 |
| Axi | AUC  Se  IC | 0.712  0.0769  0.584 - 0.819 | 0.757  0.0702  0.632 - 0.856 | **0.949**  0.0334  0.863 - 0.989 | **1.000**  0.000  0.943 - 1.000 |
| Z4 | AUC  Se  IC | 0.795  0.0617  0.675 to 0.886 | 0.694  0.0894  0.565 to 0.804 | **0.896**  0.0619  0.794 to 0.959 | **1.000**  0.000  0.943 to 1.000 |

COPD I - mild; COPD II - moderate; COPD III - severe; COPD IV – very severe; AUC - Area under the receiver-operator characteristic curve; Se – standard error; CI – confidence interval. R0, intercept resistance; Rm, mean resistance; R4, resistance at 4Hz; R12, resistance at 12Hz; R20, resistance at 20Hz; S, respiratory resistance slope; Xm, mean reactance; Cdin - dynamic complacency; fr - resonance frequency; Ax, reactance area; Z4 - respiratory impedance module.

Table S5:

Area under the receiver-operator characteristics values and the confidence interval associated with eRIC parameters.

|  |  | COPD I | COPD II | COPD III | COPD IV |
| --- | --- | --- | --- | --- | --- |
| R | AUC  Se  IC | 0.573  0.0840  0.442 to 0.697 | 0.526  0.0835  0.396 to 0.653 | 0.554  0.0838  0.424 to 0.680 | 0.712  0.0711  0.584 to 0.819 |
| Rp | AUC  Se  IC | **0.856**  0.0702  0.745 to 0.932 | **0.898**  0.0603  0.795 to 0.960 | **0.998**  0.00299  0.938 to 1.000 | **0.996**  0.00421  0.936 to 1.000 |
| Rt | AUC  Se  IC | **0.805**  0.0566  0.686 to 0.894 | **0.819**  0.0604  0.701 to 0.904 | **0.928**  0.0510  0.835 to 0.978 | **0.979**  0.0172  0.906 to 0.999 |
| I | AUC  Se  IC | 0.549  0.0724  0.419 to 0.675 | 0.656  0.0721  0.525 to 0.771 | 0.685  0.0810  0.556 to 0.796 | 0.642  0.102  0.511 to 0.759 |
| C | AUC  Se  IC | 0.660  0.0877  0.530 to 0.775 | 0.677  0.0911  0.547 to 0.789 | **0.900**  0.0644  0.798 to 0.961 | **0.974**  0.0263  0.899 to 0.998 |

COPD I - mild; COPD II - moderate; COPD III - severe; COPD IV – very severe; AUC - Area under the receiver-operator characteristic curve; Se – standard error; CI – confidence interval. R, central resistance; Rp, peripheral resistance; Rt, total resistance; I, respiratory system inertance; C, respiratory compliance; ns = non-significant.

Table S6:

Area under the receiver-operator characteristics values and the confidence interval associated with fractional-order parameters.

|  |  | DPOC I | DPOC II | DPOC III | DPOC IV |
| --- | --- | --- | --- | --- | --- |
| Damping | AUC  Se  IC | **0.821**  0.0604  0.704 to 0.906 | 0.681  0.0935  0.552 to 0.793 | **0.900**  0.0635  0.798 to 0.961 | **0.999**  0.00175  0.941 to 1.000 |
| Elastance | AUC  Se  IC | 0.660  0.0825  0.530 to 0.775 | 0.669  0.0947  0.539 to 0.783 | 0.565  0.0980  0.435 to 0.690 | **0.986**  0.0130  0.919 to 1.000 |
| Histeresivity | AUC  Se  IC | **0.902**  0.0608  0.801 to 0.963 | **0.863**  0.0711  0.753 to 0.937 | **0.868**  0.0665  0.759 to 0.940 | **0.867**  0.0643  0.757 to 0.939 |

COPD I - mild; COPD II - moderate; COPD III - severe; COPD IV – very severe; AUC - Area under the receiver-operator characteristic curve; Se – standard error; CI – confidence interval.
